# Supplementary material for: First Description of a Natural Infection with Shrimp Hemocyte Iridescent Virus in Farmed Giant Freshwater Prawn, <em>Macrobrachium Rosenbergii</em>
Source: Preprints.org preprint supplement (doi:10.20944/preprints201903.0012.v1), 2019-03-01
Supplement: Supplementary file 1 [file supplementary]

Dear Editor,

Thank you for your attention to our manuscript " First description of a natural infection with Shrimp hemocyte iridescent virus in farmed giant freshwater prawn, *Macrobrachium rosenbergii*". And the editorial office want us supply study approval number. For this manuscript, a custaceans virus were descripted in a new host *Macrobrachium rosenbergii*using some molecular biology and histopathology methods. So the object of study were virus and invertebrate, and no ethical issues exist in this study. And no approval required in our previous studies and other research for crustaceans.

Furthermore, all the protocols of animal were approved by the Animal Care and Ethics Committee, Yellow Sea Fisheries Research Institute, Chinese Academy of Fishery Sciences, and all efforts were made to minimize the suffering of animals according to recommendations proposed by the European Commission (1997). The above description have been on the Line 79-83 of the manuscript.

Best Regards,

Liang Qiu       Ph.D
